# Supplementary material
Source: MDPI journal article supplement (https://www.mdpi.com/2411-5142/8/3/89)
Supplement: s1 [file s1]

## Supplemental Table

**Supplemental Table S1.** Description of sprint interval training and field lacrosse-specific training.

| <b>Sprint Interval Training</b>                                                                                                                                                                                                                                                                                                                                                                                                                                                                                                                                                                                                                                                               |                                                                  |                                                                                                                                               |                                                                                                             |
|-----------------------------------------------------------------------------------------------------------------------------------------------------------------------------------------------------------------------------------------------------------------------------------------------------------------------------------------------------------------------------------------------------------------------------------------------------------------------------------------------------------------------------------------------------------------------------------------------------------------------------------------------------------------------------------------------|------------------------------------------------------------------|-----------------------------------------------------------------------------------------------------------------------------------------------|-------------------------------------------------------------------------------------------------------------|
|                                                                                                                                                                                                                                                                                                                                                                                                                                                                                                                                                                                                                                                                                               | <b>Monday</b>                                                    | <b>Wednesday</b>                                                                                                                              | <b>Friday</b>                                                                                               |
| Weeks 1 through 4                                                                                                                                                                                                                                                                                                                                                                                                                                                                                                                                                                                                                                                                             | 40m sprint with 10 repetitions<br><br>20 seconds of passive rest | 2 sets of 15m sprints with 10 repetitions<br><br>15 seconds of passive rest between repetitions<br><br>2 minutes of passive rest between sets | 3 suicides (16, 25, 50, 75 m, touch line with foot)<br><br>1 minute of passive rest between each repetition |
| Weeks 5 through 8                                                                                                                                                                                                                                                                                                                                                                                                                                                                                                                                                                                                                                                                             | 40m sprint with 12 repetitions<br><br>20 seconds of passive rest | 3 sets of 15m sprints with 10 repetitions<br><br>15 seconds of passive rest between repetitions<br><br>2 minutes of passive rest between sets | 3 suicides (16, 25, 50, 75 m, touch line with foot)<br><br>1 minute of passive rest between each repetition |
| Weeks 9 through 12                                                                                                                                                                                                                                                                                                                                                                                                                                                                                                                                                                                                                                                                            | 40m sprint with 14 repetitions<br><br>20 seconds of passive rest | 3 sets of 15m sprints with 12 repetitions<br><br>15 seconds of passive rest between repetitions<br><br>2 minutes of passive rest between sets | 4 suicides (16, 25, 50, 75 m, touch line with foot)<br><br>1 minute of passive rest between each repetition |
| <b>Field Lacrosse-specific Training</b>                                                                                                                                                                                                                                                                                                                                                                                                                                                                                                                                                                                                                                                       |                                                                  |                                                                                                                                               |                                                                                                             |
| <i>Fundamental / Skill Development</i>                                                                                                                                                                                                                                                                                                                                                                                                                                                                                                                                                                                                                                                        |                                                                  |                                                                                                                                               |                                                                                                             |
| <ul style="list-style-type: none"> <li>- Passing and catching drills (e.g. line passing, four corners)</li> <li>- Ground ball drills (e.g. line drills, 1 verse 1)</li> <li>- Shooting drills (both stationary and in motion)</li> <li>- Position specific drills: <ul style="list-style-type: none"> <li>- Attack player specific drills focusing on passing, catching, dodging, ground balls, and shooting</li> <li>- Midfield player specific drills focusing on passing, catching, dodging, ground balls, and defensive stick / foot work</li> <li>- Defensive player specific drills focusing on passing, catching, ground balls, and defensive stick / foot work</li> </ul> </li> </ul> |                                                                  |                                                                                                                                               |                                                                                                             |
| <i>Team Offense and Defense Development</i>                                                                                                                                                                                                                                                                                                                                                                                                                                                                                                                                                                                                                                                   |                                                                  |                                                                                                                                               |                                                                                                             |
| <ul style="list-style-type: none"> <li>- 3 verses 2 and 3 verses 3 games</li> </ul>                                                                                                                                                                                                                                                                                                                                                                                                                                                                                                                                                                                                           |                                                                  |                                                                                                                                               |                                                                                                             |

- 6 verses 5 and 6 verses 6 games
- situational scrimmages

---

m = meters and e.g. = example.

---
